# Supplementary material for: Tau Is Truncated in Five Regions of the Normal Adult Human Brain
Source: Int J Mol Sci. 2021 Mar 29;22(7):3521. doi: 10.3390/ijms22073521 (PMC8036332; doi:10.3390/ijms22073521)
Supplement: Supplementary file 1 [file ijms-22-03521-s001.pdf]

**Table S1.** Complete demographics of brain donors (including cause of death) from which tissue was obtained from the dorsolateral prefrontal cortex.

| Age (Years) | Sex    | PMI (hours) | Brain pH | Cause of death - category | Cause of death - clinical                                                      |
|-------------|--------|-------------|----------|---------------------------|--------------------------------------------------------------------------------|
| 18          | Male   | 28.5        | 6.7      | Cardiac                   | Primary cardiac arrhythmia                                                     |
| 21          | Female | 39.5        | 6.83     | Cardiac                   | Primary cardiac arrhythmia                                                     |
| 22          | Male   | 50          | 6.86     | Trauma                    | Blunt trauma                                                                   |
| 24          | Male   | 43          | 6.27     | Cardiac*                  | Undetermined (but consistent with idiopathic cardiac arrhythmia).              |
| 33          | Female | 24          | 6.77     | Cardiac                   | Cardiac arrhythmia; myocardial fibrosis                                        |
| 36          | Male   | 34          | 6.67     | Cardiac                   | Acute chronic cardiac failure                                                  |
| 37          | Male   | 14.5        | 6.46     | Cardiac                   | Presumed Cardiac Dysrhythmia due to natural cause                              |
| 37          | Male   | 24          | 6.7      |                           | Unascertained.                                                                 |
| 40          | Male   | 27          | 6.79     | Vascular                  | 1.a) Pulmonary thromboemboli b) deep venous thrombosis                         |
| 47          | Male   | 27          | 6.66     | Cardiac                   | Ischaemic heart disease.                                                       |
| 48          | Male   | 17          | 6.62     | Cardiac                   | Ischaemic heart disease. Coronary artery atheroma                              |
| 49          | Male   | 38          | 6.92     | Cardiac                   | Coronary Artery Disease                                                        |
| 50          | Male   | 40          | 6.87     | Cardiac                   | Haemopericardium                                                               |
| 50          | Male   | 34          | 6.77     | Cardiac                   | Acute Myocardial infarction                                                    |
| 51          | Male   | 35          | 7        | Cardiac                   | cardiomegaly                                                                   |
| 52          | Male   | 36          | 6.82     |                           | Undetermined.                                                                  |
| 57          | Male   | 18          | 6.39     | Cardiac                   | Myocardial Infarction                                                          |
| 58          | Male   | 39          | 6.49     | Cardiac                   | Ischaemic heart disease.                                                       |
| 59          | Male   | 15          | 6.54     | Cardiac                   | Hypertensive and atherosclerotic heart disease                                 |
| 62          | Female | 35          | 6.06     | Cardiac                   | Hypertensive and atherosclerotic heart disease                                 |
| 64          | Male   | 17          | 6.55     | Cardiac                   | Haemopericardium                                                               |
| 66          | Male   | 32          | 6.66     | Cardiac                   | cardiomegaly                                                                   |
| 67          | Male   | 25          | 6.7      | Cardiac                   | Hypertensive Heart disease                                                     |
| 69          | Female | 39          | 6.72     | Cardiac                   | Coronary Artery Disease and asthma                                             |
| 72          | Female | 25          | 7        | Cardiac                   | Atherosclerotic cardiovascular disease                                         |
| 73          | Female | 45          | 6.86     | Cardiac*                  | Atherosclerotic cardiovascular disease.                                        |
| 74          | Female | 20          | 6.59     | Cancer                    | Cancer of breast, liver and bone metastases                                    |
| 78          | Female | 45          | 6.05     | Toxicity                  | Multiple drug toxicity (7-amino nitrazepam, nitrazepam and dextropropoxyphene) |
| 80          | Male   | 12          | 6.5      | Respiratory               | Emphysema                                                                      |
| 81          | Male   | 29          | 6.57     | Cardiac                   | Heart Failure                                                                  |
| 83          | Male   | 10          | 6.67     | Respiratory               | Pulmonary embolus                                                              |
| 86          | Female | 14.5        | 6.36     | Infection                 | Septicaemia; gangrenous foot; peripheral vascular disease                      |
| 87          | Female | 5           | 6.38     | Cancer                    | Metastatic breast cancer                                                       |
| 88          | Male   | 9           | 6.36     | Respiratory               | Pneumonia; Debility; Chronic obstructive airways disease                       |
| 98          | Female | 6           | 6.7      | Respiratory               | Pneumonia; congestive cardiac failure                                          |
| 104         | Female | 27          | 5.89     | Respiratory               | Bilateral bronchopneumonia                                                     |

\* Donor was taking a statin (Lipitor) at time of death.

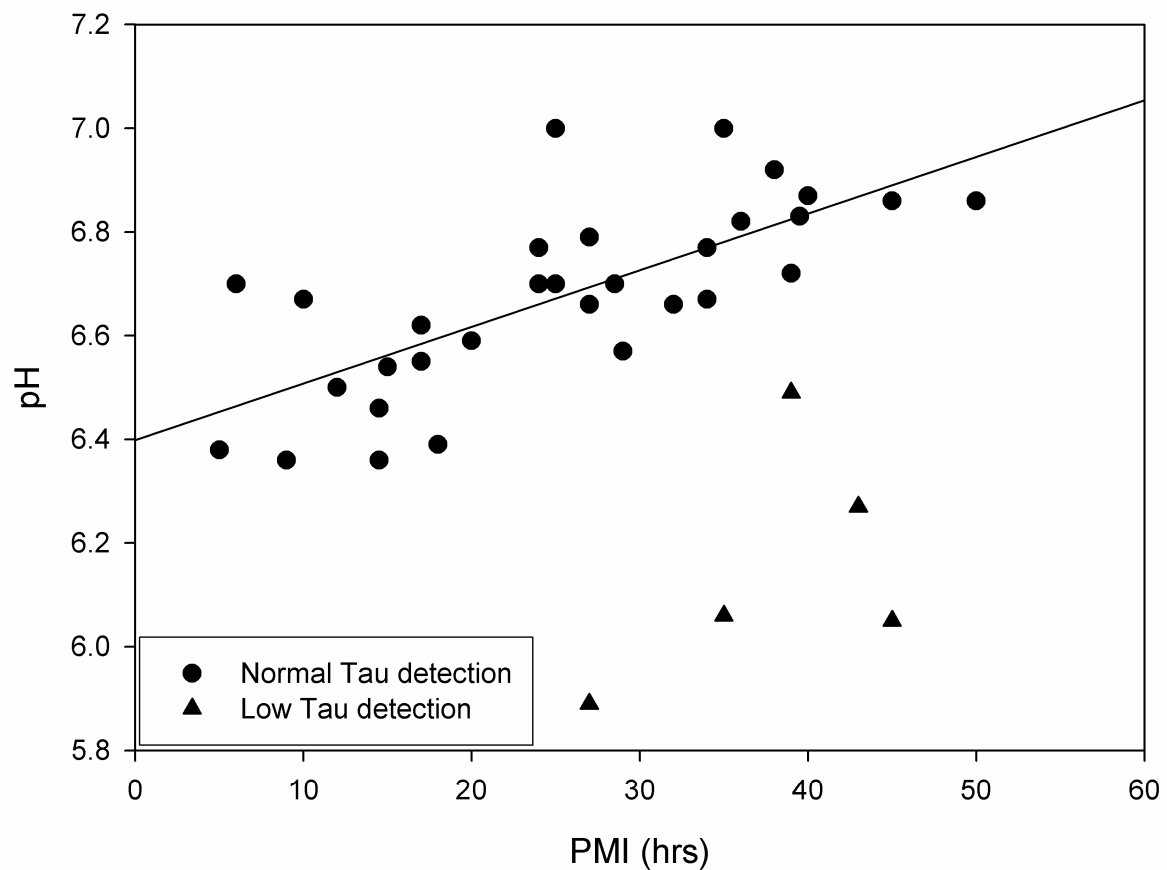

**Supplementary Figure S1.** pH of brain tissue as a function of post-mortem interval (PMI). Samples with little, or no, Tau (Triangle) as detected by the Mid-sequence antibody.

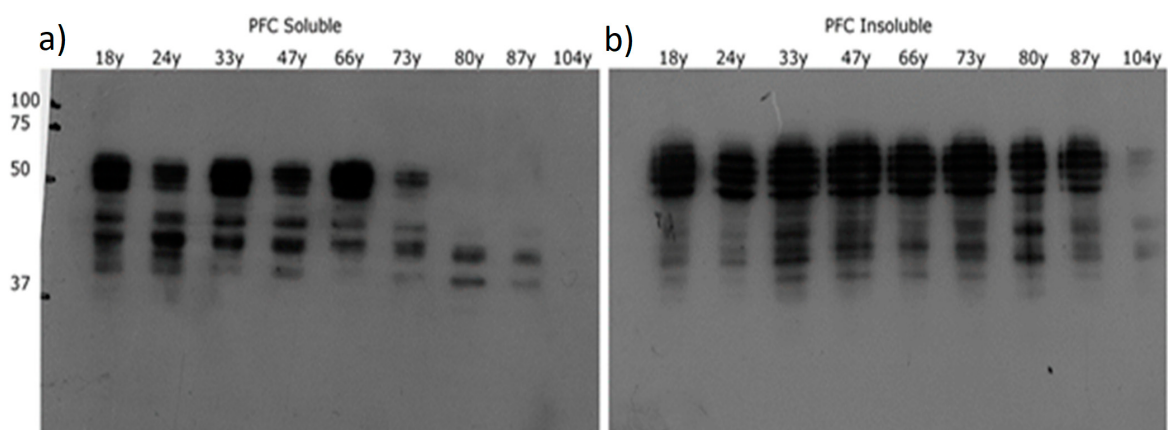

**Supplementary Figure S2.** Western blot of the a) soluble and b) insoluble PFC fractions. 10 $\mu$ g of protein was loaded per well as determined by BCA assay. Both fractions were probed by the with the Dako Tau antibody specific to the C-terminal region of Tau ( aa. 243-441).

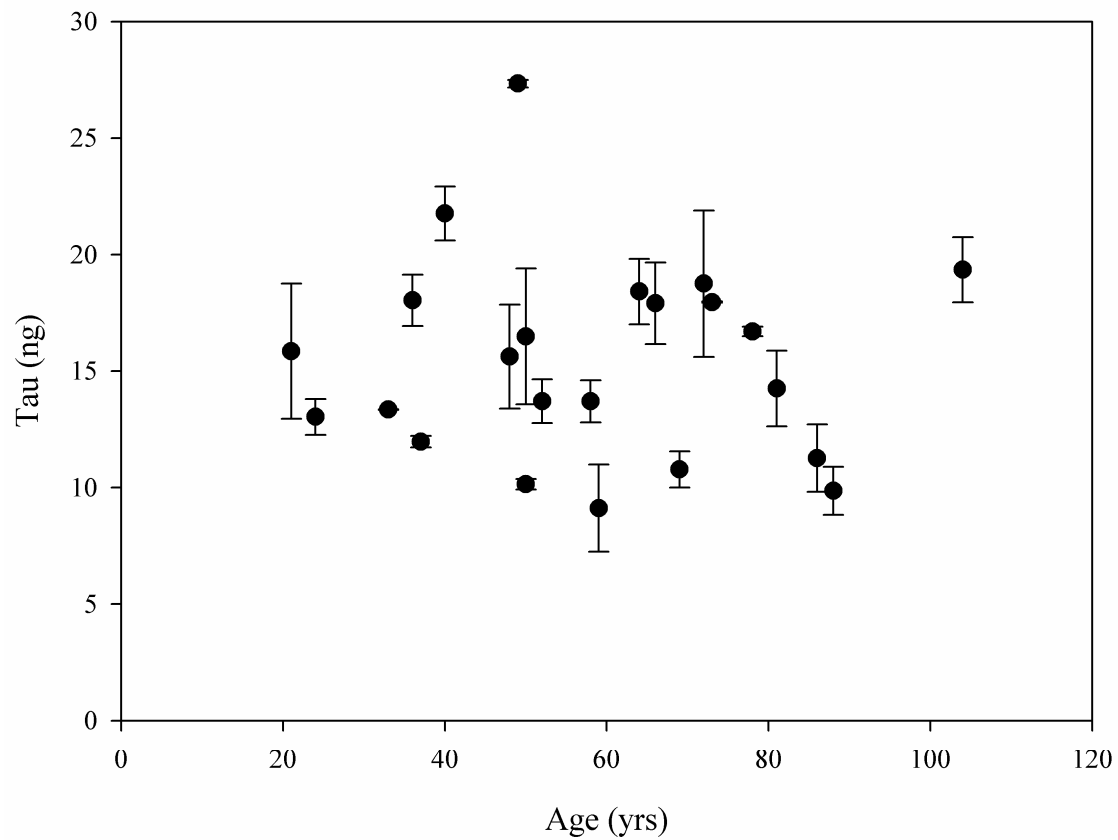

**Supplementary Figure S3** Estimation of Tau in the soluble fractions of the PFC. Soluble PFC fractions of the cohort used in this study were diluted to 5 mg/mL using concentrations determined by the BCA assay of the brain homogenates. Triplicate 2 $\mu$ L aliquots of each sample were applied onto a nitrocellulose membrane. In triplicate 100, 50, 25, 12.5 and 6.25 ng of the commercial Tau standard were separately dotted onto the nitrocellulose. Both standards and samples were probed with the Dako Tau antibody (1:10000). A standard curve was generated from the Tau standards based on their intensity. The amount of Tau in each sample was estimated from the standard curve. Error bar +/-SD.
